1  
2  
3  
4  
5  
6  
7  
8  
9  
10  
11  
12  
13  
14  
15  
16  
17  
18  
19  
20

**Title: Subjective optimality in finite sequential decision-making**

**Authors:**

Yeonju Shin,<sup>1,†</sup> HeeYoung Seon,<sup>1,†</sup> Yun Kyoung Shin,<sup>2</sup> Oh-Sang Kwon,<sup>1,\*</sup> Dongil Chung<sup>1,\*</sup>

**Affiliations:**

<sup>1</sup>Department of Human Factors Engineering, UNIST, Ulsan, South Korea

<sup>2</sup>Department of General Education, University of Ulsan, Ulsan, South Korea

<sup>†</sup>These authors contributed equally to this work.

\*Correspondence should be made to

O.-S.K. ([oskwon@unist.ac.kr](mailto:oskwon@unist.ac.kr)) or D.C. ([dchung@unist.ac.kr](mailto:dchung@unist.ac.kr)).

21 **Abstract**

22

23 Many decisions in life are sequential and constrained by a time window. Although mathematically  
24 derived optimal solutions exist, it has been reported that humans often deviate from making  
25 optimal choices. Here, we used a secretary problem, a classic example of finite sequential decision-  
26 making, and investigated the mechanisms underlying individuals' suboptimal choices. Across  
27 three independent experiments, we found that a dynamic programming model comprising  
28 subjective value function explains individuals' deviations from optimality and predicts the choice  
29 behaviors under fewer opportunities. We further identified that pupil dilation reflected the levels  
30 of decision difficulty and subsequent choices to accept or reject the stimulus at each opportunity.  
31 The value sensitivity, a model-based estimate that characterizes each individual's subjective  
32 valuation, correlated with the extent to which individuals' physiological responses tracked stimuli  
33 information. Our results provide model-based and physiological evidence for subjective valuation  
34 in finite sequential decision-making, rediscovering human suboptimality in subjectively optimal  
35 decision-making processes.

36

37 Keywords: Suboptimality, Subjective valuation, Secretary problem, Decision-making, Pupil  
38 dilation

39

40

41

## 42 Introduction

43

44 Hiring a new employee is one of the toughest decisions to make as a team leader. Most of the time,  
45 there are only a limited number of job openings available and a limited time period in which to  
46 complete the hiring process. This process is even more difficult when applicants are accepted on  
47 a rolling basis, because one has to make a choice whether to accept the current applicant without  
48 knowing whether other future potential applicants would have been a better fit for the job. Likewise,  
49 there are many decision problems in life that are sequential and constrained by a certain time  
50 window. The ‘secretary problem’ is a classic example of this finite sequential decision problem  
51 and has been widely used to understand the optimal policy in making choices (e.g., to hire or not)  
52 under a limited number of opportunities (Ferguson, 1989; Freeman, 1983). Provided with the full  
53 information (i.e., the distribution of candidates), the optimal solution for the problem is to choose  
54 the first number that is above a mathematically calculated decision threshold (Hill & Kregel,  
55 1991). However, it is not clear whether and how humans deviate from optimal choices. Here, we  
56 used one variant of the secretary problem, in which the distribution of candidates is given and the  
57 reward is the value of the chosen candidate, to investigate (i) whether individuals make the optimal  
58 decision in a finite sequential decision problem, and (ii) if not, how do they make their decisions.  
59 Our results provide behavioral and physiological evidence supporting that individuals make  
60 threshold-based choices in a finite sequential decision problem and that seemingly suboptimal  
61 decision patterns (deviation from the optimal) originate from the process of optimally calculating  
62 thresholds using individuals’ subjective value function.

63

64

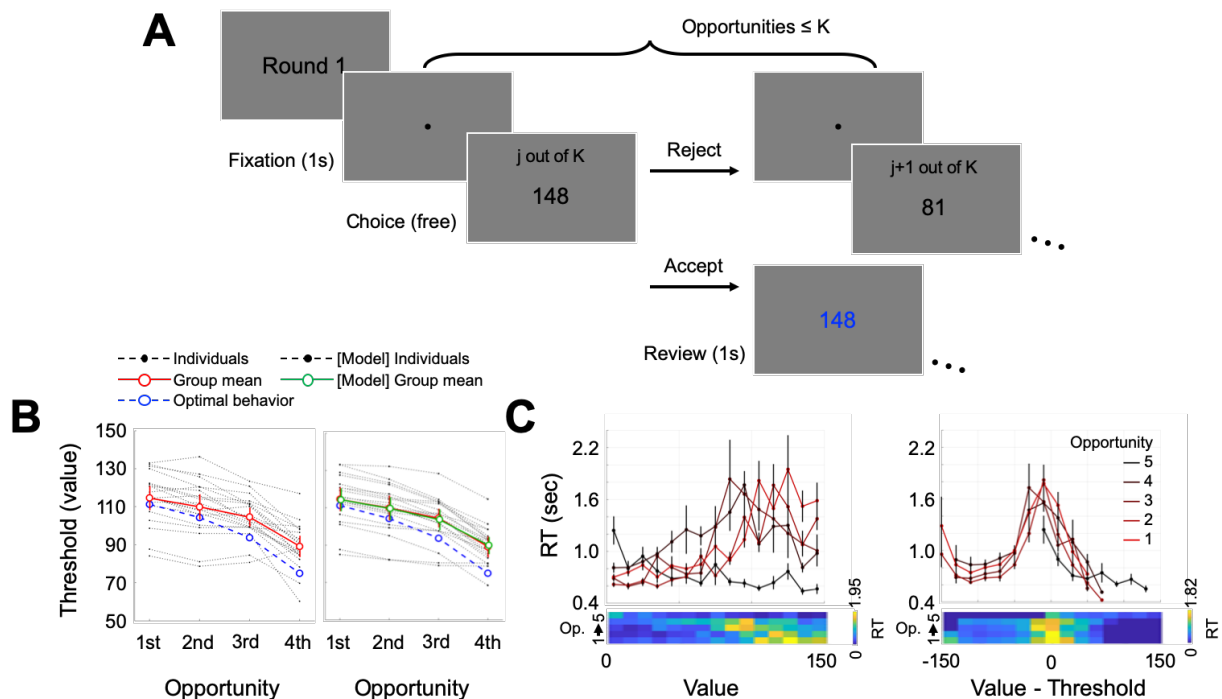

65

66 **Figure 1. Experimental procedures and behavioral results of Experiment 1.** (A) Participants  
67 made a series of choices between accepting and rejecting a presented number. At each round, they  
68 had up to K opportunities ( $K = 5$  in Experiment 1,  $K = 2$  or  $5$  in Experiment 2) to reject the number  
69 and get a new random number; the round ended when participants accepted a presented number.

70 At the last opportunity, participants were given no choice but to accept the presented number. A  
71 new set of stimuli (numbers) was used in the next round. **(B)** The optimal decision threshold per  
72 opportunity (blue), calculated under the assumption of the full information, was compared with a  
73 corresponding empirical decision threshold (red). **(C)** Response times (RTs) for each opportunity  
74 were computed against the presented stimuli values. Regardless of the opportunity, RTs showed  
75 negative association with the absolute distance between the presented stimuli and the  
76 corresponding decision threshold. That is, participants showed the shortest RTs for the numbers  
77 that are farthest from decision thresholds, and vice versa. Error bars represent s.e.m.

78  
79

80 To examine how individuals make choices in a finite sequential decision problem, we recorded  
81 behavioral choices, response time (RT), and pupil dilation of 91 participants (male/female = 45/46,  
82 age =  $22.88 \pm 1.93$  years) as they made a series of choices to accept or reject a random number  
83 presented on the screen (**Fig. 1A**). During each round, they had a fixed amount of opportunities  
84 (chances) to evaluate a new random number by rejecting previously presented numbers. When  
85 they accepted, the presented number was added to their final payoff, and then they moved on to  
86 the next round (up to 200 rounds) that consisted of a new set of chances. Overall, we implemented  
87 three separate experiments. In Experiment 1, participants had up to five opportunities ( $K = 5$ ), and  
88 they were not explicitly informed of the maximum number that would be presented. Experiment 2  
89 had up to two or five opportunities ( $K = 2$  or  $5$ ), and the participants were informed of the full  
90 distribution information (including the maximum). In Experiment 3, to temporally dissociate  
91 actions (choosing to accept or reject) from physiological responses to stimuli, participants were  
92 not allowed to make a choice until an audio cue was played. All the other settings were equal to  
93 Experiment 2 where participants had up to five chances ( $K = 5$ ). Non-overlapping samples were  
94 obtained from each experiment (see **Materials and Methods** for detailed experimental  
95 procedures).

96  
97

## 98 **Results**

99

### 100 **Experiment 1**

101

102 **Individuals show higher decision thresholds than the optimal decision model.** Each presented  
103 number, sampled from a uniform distribution ranging from 0 to 150, could be considered as an  
104 option whose value matches its face value (the number). Because individuals can only accept a  
105 single number within each round, they should accept a number only when it is large enough.  
106 Specifically, an optimal decision-maker should not accept a presented number unless it is larger  
107 than the expected value of successive opportunities. For example, individuals should accept any  
108 numbers at the last opportunity (i.e., the fifth opportunity in Experiment 1) and thus the expected  
109 value of the last opportunity is 75. Based on this information, at the opportunity one before the last  
110 (the fourth in Experiment 1), a value-maximizing individual should accept any numbers higher  
111 than 75 but reject other numbers. Following the dynamic programming approach, (Bellman, 1966)  
112 we computed an optimal threshold for each opportunity (**Fig. 1B**, blue).

113

114 To examine whether individuals follow such decision processes, we calculated empirical  
115 thresholds—the value where individuals were equally likely to accept or reject—from 20

116 participants' behavioral choices (male/female = 10/10, age = 22.85 ± 1.31 years) (**Fig. 1B**).  
117 Consistent with the optimal thresholds (blue), empirical thresholds (red) at the later opportunities  
118 were lower than those at the earlier opportunities (mean threshold differences between the first  
119 and the second = 4.70,  $t(19) = 5.24$ , Cohen's  $d = 1.17$ ,  $p = 4.66e-5$ ; the second and the third = 5.39,  
120  $t(19) = 3.99$ , Cohen's  $d = 0.89$ ,  $p = 7.84e-4$ ; and the third and the fourth = 15.38,  $t(19) = 7.10$ ,  
121 Cohen's  $d = 1.59$ ,  $p = 9.41e-7$ ). However, participants showed empirical thresholds significantly  
122 higher than the optimal thresholds, indicating that people have higher expectations about later  
123 opportunities (the difference between empirical and optimal thresholds = 8.49,  $t(19) = 3.28$ ,  
124 Cohen's  $d = 0.73$ ,  $p = 0.004$ ).

125  
126 Compared with optimal thresholds, it is not difficult to notice that the average empirical thresholds  
127 have a shallower slope as evidenced by the increasing difference between the empirical and  
128 optimal thresholds across opportunities (mean slope of [empirical - optimal]: 3.75,  $t(19) = 4.40$ ,  
129 Cohen's  $d = 0.98$ ,  $p = 3.08e-4$ ). Although the empirical decision thresholds suggest otherwise, one  
130 may still suspect that an alternative heuristic individuals might have used was to apply a constant  
131 threshold regardless of the number of remaining opportunities (i.e., applying a constant threshold  
132 across all opportunities). It is well known that easier choices—here, deciding whether to accept or  
133 not the presented value that is far smaller or larger than the threshold—require shorter response  
134 times (RT) (Ratcliff, 1978). If individuals applied the same threshold across all opportunities,  
135 mean RTs should be symmetric around a certain value (i.e., threshold). To examine this possibility,  
136 we calculated mean RT within each opportunity. The symmetric pattern was observed only when  
137 mean RTs were calculated as a function of presented values adjusting for the estimated empirical  
138 threshold within each corresponding opportunity (**Fig. 1C**). This result suggests that individuals  
139 did apply differential thresholds for each opportunity during decision-making.

140  
141 **Subjective optimality explains individual choice patterns.** Prospect theory has suggested that  
142 outcomes are perceived as gains and losses relative to a certain reference point, and that gains and  
143 losses are valued following concave and convex subjective value functions, respectively (Tversky  
144 & Kahneman, 1979). We drew on this framework to evaluate potential decision processes  
145 accounting for individuals' sub-optimal decision thresholds. In accordance with Prospect theory  
146 (Tversky & Kahneman, 1979), we hypothesized that individuals' subjective valuation ( $U$ ) for a  
147 given value ( $v$ ) is dependent on their individual reference point ( $r$ ) and nonlinear value sensitivity  
148 ( $\rho$ ), as follows:

149  
150 
$$U = (v - r)^\rho \quad \text{if } v \geq r$$
  
151 
$$U = -(r - v)^\rho \quad \text{otherwise.}$$
  
152

153 Note, we focused on valuation *per se*, and thus, the time it took for individuals to establish (learn)  
154 their reference points (their own perspective of the environment) was assumed negligible (see  
155 **Discussion** for further consideration of learning effects). Importantly, two additional components  
156 were introduced. First, individuals may perceive the waiting time till acceptance costly and take it  
157 into account in valuation. Second, we hypothesized that this subjective value-based computation  
158 occurs not only during active decision-making, but also at mental simulation such that individuals  
159 use their subjective valuation in constructing expectations of each opportunity (i.e., computing  
160 decision thresholds; **Fig. 2A**).

161

162

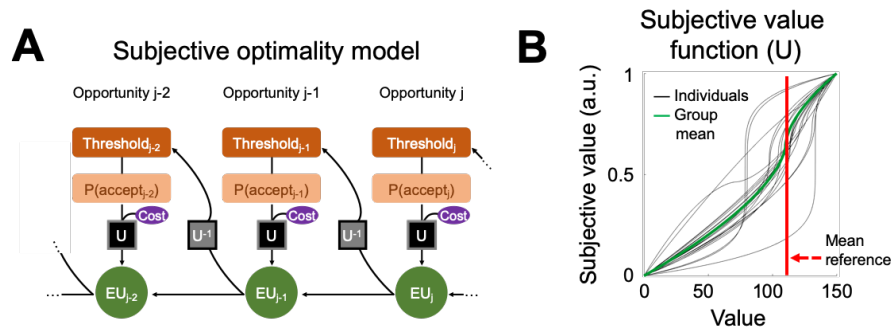

163

164

165

166

167

168

169

170

171

172

173

174

175

176

177

178

179

180

181

182

183

184

185

186

187

188

189

190

191

192

193

194

195

196

197

198

199

**Figure 2. Subjective optimality model. (A)** The optimal decision model assumes that individuals compute the decision threshold of a certain opportunity based on the expected value of successive opportunities. In the ‘Subjective optimality model’, expected values of the successive opportunities are replaced by expected utilities (EU) calculated based on the subjective value function as per Prospective theory. **(B)** Two free parameters, reference point, and nonlinear value sensitivity define subjective valuation of the presented stimuli values. Group average subjective value function (green) is depicted using the group mean of individual estimates: reference point = 114.77; value sensitivity = 0.47.

This ‘Subjective optimality model’ with a waiting cost converges to three nested models in special cases: the Subjective optimality model without a waiting cost ( $\text{Cost} = 0$ ), the Optimal decision model ( $\rho = 1$ ), and the Constant threshold model ( $\rho = 0$ ) (see **Materials and Methods** for model details). A formal model comparison using a likelihood ratio test revealed that the Subjective optimality models with and without a potential waiting cost explained individuals’ choice behaviors comparably well ( $\chi^2(20) = 19, p = 0.52$ ). Moreover, these models showed superior explanatory power compared to the two other nested decision models (**Table S1**). These results suggest that the waiting cost was negligible in Experiment 1, values larger than the reference point (114.77; **Fig. 2B**) were perceived as gains, and any value stimuli smaller than the reference point were perceived as potential losses. Moreover, this result indicates that individuals use marginally diminishing (concave) and increasing (convex) subjective value function for gains and losses, respectively, in finite sequential decision-making.

## Experiment 2

**The Subjective optimality model predicts behavioral alterations in the context of scarce opportunity.** In our suggested model, change of reference point reframes one’s subjective valuation and, in turn, alters decision thresholds. Given this causal relationship, we can predict that one would lower their decision threshold in the context where one expects less overall outcome and consequently sets a lower reference point. To examine whether empirical data matches the prediction from the model, we conducted a second experiment where some participants had five ( $K = 5$ ) and other participants had two opportunities ( $K = 2$ ) in each round (**Fig. 1A**). That is, in contrast to Experiment 1, individuals who had two opportunities always had to accept the second value if they rejected the first presented stimulus. If individuals followed the Optimal decision model, the decision threshold at the first opportunity among  $K = 2$  should be equal to the decision threshold at the fourth opportunity among  $K = 5$ . As predicted from the Subjective optimality



200 model, the decision thresholds estimated from participants ( $K = 2$ :  $N = 23$ , male/female = 11/12,  
 201 age =  $23.09 \pm 2.09$  years;  $K = 5$ :  $N = 21$ , male/female = 11/10, age =  $23.19 \pm 1.86$  years; non-  
 202 overlapping from Experiment 1) were significantly different depending on the number of  
 203 opportunities one had per round (threshold $_{K=5, 4th} = 90.42 \pm 9.72$ , threshold $_{K=2, 1st} = 79.28 \pm 15.45$ ;  
 204  $t(42) = 2.83$ , Cohen's  $d = 0.85$ ,  $p = 0.007$ ; **Fig. 3A**). Of note, different from Experiment 1, the  
 205 Subjective optimality model better explained participants' empirical choices for  $K = 5$  when a  
 206 waiting cost was included as a free parameter (**Table S1**). However, the group mean of the  
 207 estimated waiting cost was not different from zero ( $t(20) = 0.37$ , Cohen's  $d = 0.08$ ,  $p = 0.71$ ),  
 208 suggesting that the additional parameter was needed to explain individual differences in their  
 209 subjective waiting costs.  
 210

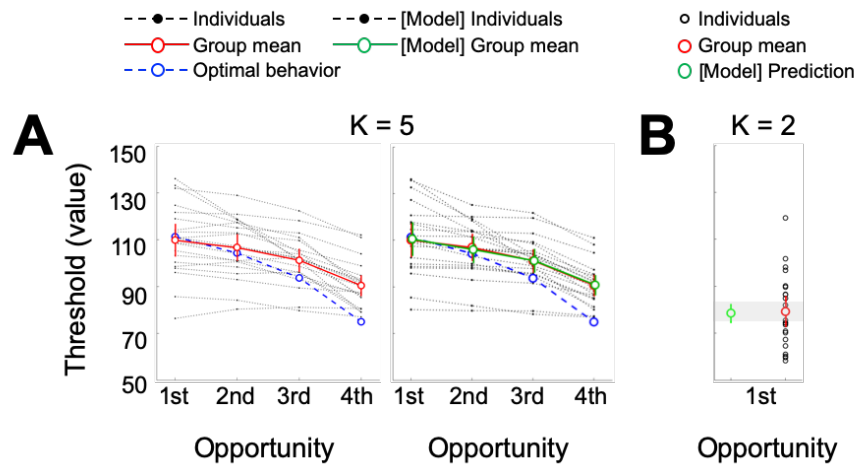

211 **Figure 3. Behavioral results of Experiment 2.** (A) In individuals who had five opportunities ( $K$   
 212 = 5), empirical decision thresholds (red) along the opportunities were comparable with that of  
 213 Experiment 1. To examine whether or not our Subjective optimality model can be generalized to  
 214 other contexts, a model prediction of the decision threshold was made for  $K = 2$  (green); value  
 215 sensitivity was assumed to be the same even in the different context, but the reference point was  
 216 set to a lower level adjusted proportionately to the reduction of the expected payoff. (B) Empirical  
 217 (observed) decision threshold in individuals who had two opportunities ( $K = 2$ ) was consistent  
 218 with the prediction. Error bars represent s.e.m.  
 219  
 220

221  
 222 Next, we examined whether our model quantitatively captures behavioral alterations dependent on  
 223 the scarcity of opportunities. By lowering the reference point parameter proportionately to the  
 224 extent of expected payoff reduction and keeping all the other parameters the same, the model-  
 225 based threshold prediction for  $K = 2$  ( $78.50 \pm 4.09$ ; **Fig. 3B**, green) was consistent with the  
 226 observed behavioral threshold (see **Materials and Methods** for model prediction details), which  
 227 supports the critical role of the reference point in subjective valuation. One may suggest that the  
 228 task with  $K = 2$  is simple enough for participants and that they would have followed the optimal  
 229 strategy (i.e., using 75 as a decision threshold at the first opportunity). However, this is unlikely  
 230 given that only 7 out of 23 participants' credible intervals of the empirical decision threshold,  
 231 defined by the 95% highest density interval, included 75 (see **Materials and Methods**).  
 232 Furthermore, the large across-individual variability in behavioral decision thresholds ( $SD = 15.45$ ;  
 233 **Fig. 3B**) showcased that the Optimal decision model cannot explain individuals' decision

234 strategies. These results again support the Subjective optimality model suggesting that individuals  
235 make threshold-based choices in a finite sequential decision problem, and that seemingly  
236 suboptimal decision patterns (e.g., waiting for future chances) may have originated from the  
237 process of calculating thresholds using individuals' subjective value function.

238

### 239 Experiment 3

240

241 To further investigate physiological instantiation of the decision processes implemented in our  
242 model, we examined changes of pupil diameter acquired while participants made a series of  
243 choices. A rich set of evidence suggests that pupil dilation (or contraction) reflects not only  
244 individuals' arousal level (Nassar et al., 2012; Urai, Braun, & Donner, 2017), but also cognitively  
245 complex information, such as value (Van Slooten, Jahfari, Knapen, & Theeuwes, 2018),  
246 uncertainty (Urai et al., 2017), cognitive conflict (Cavanagh, Wiecki, Kochar, & Frank, 2014), and  
247 choice (de Gee, Knapen, & Donner, 2014). Drawing upon these findings, we hypothesized that,  
248 should subjective valuation occur as proposed, changes of pupil diameter may capture value of  
249 stimuli, decision difficulties, and final choices that participants would make. To test this hypothesis,  
250 we operated a slightly modified task; (i) participants had to view the presented stimuli for a period  
251 of time (1.5-2.5 seconds) before being allowed to accept or reject the stimuli, and (ii) an audio cue  
252 was used to announce to participants that they could make a choice (**Fig. 4A**). This modification  
253 temporally dissociated choice from other cognitive processes (e.g., valuation) and prevented the  
254 introduction of any visual confounds in analyzing physiological signals at the time of decision-  
255 making. Participants had up to five opportunities per each round, and all other experimental  
256 settings were equal to Experiment 2 (see **Materials and Methods** for details).

257

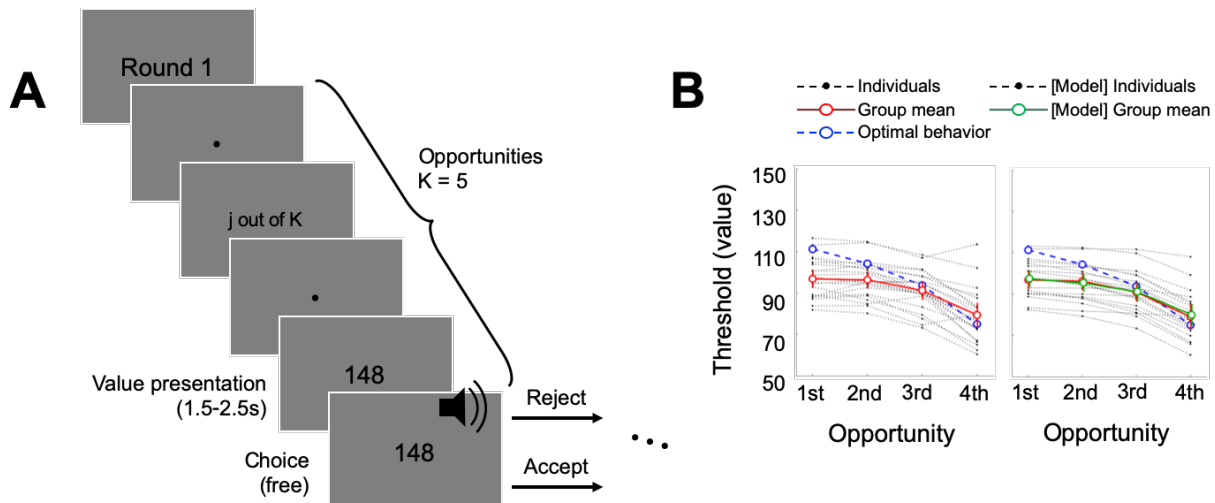

258

259 **Figure 4. Experimental procedures and behavioral results of Experiment 3.** (A) To temporally  
260 dissociate valuation from action selection, we implemented a modified task design where  
261 individuals had to wait for an audio cue to make choices. (B) Empirical decision thresholds (red)  
262 were compared with the optimal decision thresholds (blue). Compared with Experiments 1 and 2,  
263 in Experiment 3, individuals showed lower decision thresholds at the early opportunities. Error  
264 bars represent s.e.m.

265

266



267 **Waiting is costly.** Twenty-two new participants were recruited for Experiment 3 (10 females, age  
268 =  $22.59 \pm 2.32$  years; non-overlapping from Experiments 1 or 2). With the addition of forced  
269 waiting time, which accumulated over opportunities, we expected that participants would perceive  
270 choices to accept after a longer wait less valuable (Kable & Glimcher, 2007; Loewenstein & Prelec,  
271 1992) and thus, they would accept earlier. Consistent with our expectation, a stark difference in  
272 the behavioral pattern was observed in Experiment 3 compared to Experiments 1 and 2.  
273 Specifically, decision thresholds from empirical data in Experiment 3 (red solid line) were below  
274 the optimal decision thresholds (blue dotted line), indicating that participants were more likely to  
275 accept small numbers that they would have rejected in the other two experimental settings (**Fig.**  
276 **4B**).

277  
278 This result was corroborated by the model-based results. First, the Subjective optimality model  
279 with a waiting cost showed superior explanatory power for Experiment 3 compared with  
280 alternative models (**Table S1**), emphasizing again that the waiting cost plays an important role in  
281 finite sequential decision-making. Second, the average of the estimated waiting cost parameter  
282 was significantly larger than zero only in Experiment 3 ( $t(20) = 63.51$ , Cohen's  $d = 13.86$ ,  $p =$   
283  $1.51e-24$ ), and it was larger than the cost parameters in the other two experiments (Experiment 3  
284  $> 1$ :  $t(40) = 15.67$ , Cohen's  $d = 4.84$ ,  $p < 1.00e-15$ ; Experiment 3  $> 2$ :  $t(41) = 5.64$ , Cohen's  $d =$   
285  $1.72$ ,  $p = 1.41e-6$ ; **Fig. 5**). Third, as it was intended from the task modification, individuals'  
286 behavioral change was sourced specifically back to the waiting cost parameter, such that other  
287 parameters (nonlinear value sensitivity and reference point) were not affected (**Fig. 5**). These  
288 results together support our interpretation suggesting that the perceived cost of waiting underlies  
289 the behavioral alteration in the new task environment.  
290

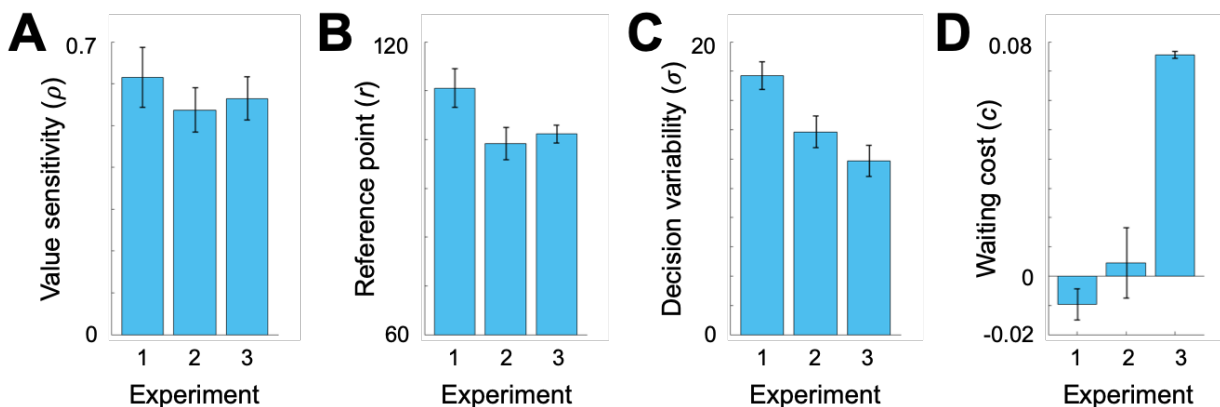

291  
292 **Figure 5. Best fitting parameters.** The Subjective optimality model was used to estimate the four  
293 parameters that explain individuals' behavioral choices. **(A)** The estimated nonlinear value  
294 sensitivity ( $\rho$ ) was comparable among all three separate experiments (Experiments 1, 2 ( $K = 5$ ),  
295 and 3:  $F(2, 59) = 0.45$ ,  $p = 0.64$ ). **(B)** There was a significant difference in reference points between  
296 experiments ( $F(2, 59) = 3.67$ ,  $p = 0.032$ ). Post-hoc tests revealed that the difference originates from  
297 the higher reference point in Experiment 1 where participants were not informed of the maximum  
298 stimuli value (Tukey test: Experiment 1 vs. 2:  $p = 0.036$ ; Experiment 1 vs. 3:  $p = 0.099$ ; Experiment  
299 2 vs. 3:  $p = 0.893$ ). **(C)** There was a significant difference in decision variability between  
300 experiments ( $F(2, 59) = 8.00$ ,  $p = 8.40e-4$ ). Post-hoc tests revealed that the difference originates  
301 from the higher decision variability in Experiment 1 (Tukey test: Experiment 1 vs. 2:  $p = 0.031$ ;

302 Experiment 1 vs. 3:  $p = 0.001$ ; Experiment 2 vs. 3:  $p = 0.372$ ). **(D)** Waiting costs were larger than  
303 zero only in Experiment 3 (Experiment 1:  $t(19) = -1.84$ , Cohen's  $d = -0.41$ ,  $p = 0.082$ ; Experiment  
304 2:  $t(20) = 0.37$ , Cohen's  $d = 0.08$ ,  $p = 0.71$ ; Experiment 3:  $t(20) = 63.51$ , Cohen's  $d = 13.86$ ,  $p =$   
305  $1.51e-24$ ). Moreover, the estimated waiting cost in Experiment 3 was significantly larger than  
306 those in the other two Experiments (Experiment 3 > 1:  $t(40) = 15.67$ , Cohen's  $d = 4.84$ ,  $p < 1.00e-$   
307  $15$ ; Experiment 3 > 2:  $t(41) = 5.64$ , Cohen's  $d = 1.72$ ,  $p = 1.41e-6$ ). Error bars indicate s.e.m.

308  
309

310 **Pupil dilation reflects choice and decision difficulty.** As described above, we then examined  
311 whether physiological responses reflect cognitive decision processes. First, we compared pupil  
312 diameter changes between accepted and rejected opportunities. Consistent with previous reports,  
313 pupil size was significantly different depending on the subsequent choices (de Gee et al., 2014)  
314 (**Fig. 6A**). Particularly, pupil dilations within 558-726 msec and 1182-1500 msec were associated  
315 with subsequent acceptance of the presented values ( $t(17) > 2.11$ , all  $ps < 0.05$ ). Only the latter  
316 cluster remained significant after controlling for multiple comparisons using a cluster-based  
317 permutation method (Maris & Oostenveld, 2007) (numerical  $p = 3.50e-4$ ). Still, given the fact that  
318 the time of the earlier cluster (558-726 msec) overlaps with the range of RTs in Experiments 1 and  
319 2 (**Fig. 1C, S1**), this result suggests that participants may have covertly made choices as early as  
320 550 msec and the cognitive process was reflected in the physiological responses (de Gee et al.,  
321 2014) (see **Fig. S2** for a pupil size result reflecting individuals' arousal level).

322

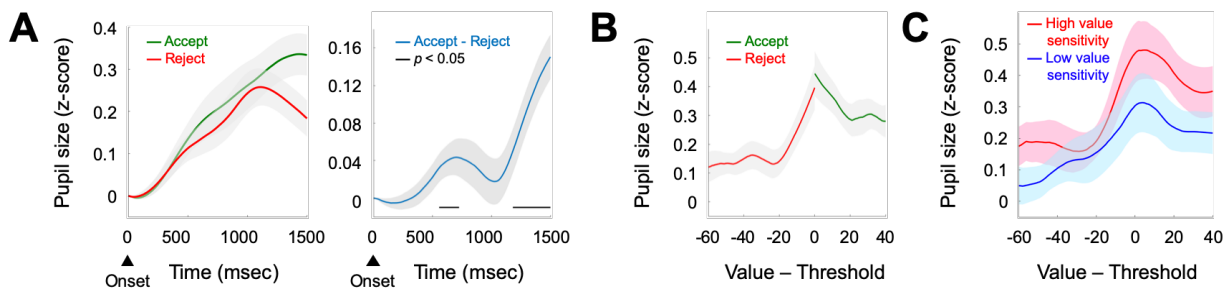

323  
324 **Figure 6. Pupillometry responses reflect subsequent choices and decision values.** **(A)** Pupil  
325 size change from the stimuli onset was measured, separately for the accepted (green) and rejected  
326 (red) opportunities. Paired comparison between the cases revealed significant pupil dilation for the  
327 accepted stimuli at the early stage after the onset, and again at the later time. **(B)** To examine  
328 whether or not pupil size reflected stimuli value, pupil size 1500 msec after the stimuli onset was  
329 depicted as a function of the signed distance between stimuli value and the corresponding decision  
330 threshold. **(C)** Individuals who had higher value sensitivity in their estimated parameter (median  
331 split; red) showed more pronounced pupillometric responses reflecting the value information.  
332 Shades represent s.e.m.

333

334

335 Next, we calculated mean pupil diameters as a function of subjective values. This was done for  
336 accepted and rejected stimuli separately, so that the relationship between pupil sizes and values is  
337 independent of subsequent choices. Regardless of the choice, as we observed from RT patterns  
338 (**Fig. 1C, S1**), pupil size was negatively correlated with 'decision difficulty'. That is, in both  
339 rejected and accepted trials, pupil size decreased as a function of the absolute distance between the  
340 decision threshold and value of the presented stimuli (Rejected trials: slope = -0.0043,  $t(17) = -$

341 2.48, Cohen's  $d = -0.58$ ,  $p = 0.024$ ; Accepted trials: slope =  $-0.0039$ ,  $t(17) = -2.49$ , Cohen's  $d = -$   
342  $0.59$ ,  $p = 0.024$ ; **Fig. 6B**). Steepness of the slopes was comparable between accepted and rejected  
343 opportunities ( $t(17) = 0.19$ , Cohen's  $d = 0.05$ ,  $p = 0.85$ ). However, the intercept, i.e., pupil dilation  
344 at the corresponding threshold, was higher for accepted than rejected trials ( $t(17) = 2.13$ , Cohen's  
345  $d = 0.50$ ,  $p = 0.046$ ). Furthermore, pupil sizes between accepted and rejected trials were  
346 significantly different even after controlling for the distance between stimuli and the threshold  
347 ( $t(17) = 3.62$ , Cohen's  $d = 0.85$ ,  $p = 0.002$ ), which indicates that pupil sizes reflect additional  
348 information other than decision difficulty. Together, these results suggest that pupil dilation  
349 reflects both decision difficulty and subsequent choices (Cavanagh et al., 2014; de Gee et al., 2014),  
350 the two crucial components comprising subjective valuation (Kolling et al., 2016; Rangel, Camerer,  
351 & Montague, 2008).

352  
353 **Physiological sensitivity matches behavioral value sensitivity.** As evidenced by the model  
354 parameter estimates, there are individual differences in the extent to which one responds to a unit  
355 increase of presented stimulus value (i.e., value sensitivity). We tested whether or not this  
356 modeling construct of individual characteristics matches with individuals' physiological responses.  
357 To provide an illustrative description, we divided participants into two subgroups based on their  
358 parameter estimation (median split) where one group had lower value sensitivity and the other  
359 group had higher value sensitivity. For each group, we calculated average pupil dilation as a  
360 function of signed decision difficulty (the difference between stimulus value and the decision  
361 threshold of the corresponding opportunity) (**Fig. 6C**). Individuals who had high value sensitivity  
362 (red) showed relatively high pupil dilation compared to individuals who had low value sensitivity  
363 (blue). This positive correlation between value sensitivity and pupil dilation was statistically  
364 significant at the threshold where decision difficulty is the highest (Pearson's correlation  $r = 0.52$ ,  
365  $p = 0.027$ ). The result indicates that individuals who have high behavioral value sensitivity indeed  
366 have higher physiological sensitivity to stimuli value. Moreover, the consistent patterns across  
367 physiological and behavioral data reflecting individuals' characteristics serve as additional  
368 evidence suggesting the use of subjective valuation in finite sequential decision-making.

369

370

## 371 **Discussion**

372

373 Our results provide a model-based explanation for suboptimality in finite sequential decision-  
374 making. Specifically, we present evidence that subjective valuation reflecting individuals' belief  
375 about the environment underlies the mechanism of how the brain computes decision thresholds in  
376 the problem.

377

378 As a classic example of a finite sequential decision problem, various versions of the secretary  
379 problem were investigated (Ferguson, 1989; Freeman, 1983). The standard secretary problem  
380 simulates the cases where only the relative ranks matter, such that individuals have to find the best  
381 option (e.g., a candidate in a hiring scenario) among the sequentially presented options (Chow,  
382 Moriguti, Robbins, & Samuels, 1964; Guan & Lee, 2018). In this setting, inferior choices  
383 (choosing options that are not the best) lead to no reward, but we have to note that this is hardly  
384 the case in real-life. First, any choices we make should have some value even in the case where  
385 they were not the best option. For example, an employee who ends up not meeting the employer's  
386 original expectation still can make some contribution (except for an unfortunate case in which the

387 employee turns out to be a con artist and shuts down the business). Second, in reality, it is  
388 impossible for the decision maker to learn the true relative rank of the chosen option, because the  
389 decision maker will have no knowledge about the subsequent options that were to follow. In other  
390 words, there is no one who can examine the success of the choice and deliver a reward if, and only  
391 if, the choice were correct. The current study addressed this discrepancy by implementing a task  
392 where each option had a monetary reward that matched its face value. Although there was no  
393 explicit instruction saying that individuals should find the best option within the finite number of  
394 opportunities, participants were informed that the final payoff would be determined by the  
395 accumulated reward amount across the entire task and thus, the task preserved the goal of reward  
396 maximization. We believe that the current variation of the secretary problem provides a more  
397 naturalistic setting to investigate individuals' sequential decision-making.

398  
399 A typical behavior pattern observed across various versions of the secretary problem is that  
400 individuals show suboptimal choices, such that they wait less than the optimal stopping point  
401 (Bearden, Rapoport, & Murphy, 2006; Seale & Rapoport, 1997). This suboptimal choice tendency  
402 is accounted for by lower decision thresholds than the optimal decision threshold, indicating that  
403 they are more likely to accept the option that has low value. Our results across the three  
404 experiments may seem inconsistent from this perspective. Particularly, individuals showed higher  
405 thresholds for both Experiments 1 and 2, but lower thresholds for Experiment 3. The main change  
406 in Experiment 3 was the additional forced wait introduced before the cue when participants were  
407 allowed to submit their choice. Our model-based analysis results suggest that this subtle change in  
408 task design may have triggered participants to think more about the tradeoff between payoffs and  
409 time they spent per round. Such an impact of additional 'cost of waiting (extra time)' is consistent  
410 with previous reports showing that non-zero interview cost was associated with lowering decision  
411 thresholds (Costa & Averbeck, 2015; Seale & Rapoport, 1997; Yeo, 1998). Our model parameter  
412 estimates supported this interpretation, such that only in Experiment 3, the estimated cost was  
413 significantly larger than zero. These results highlight that the context of decision-making (e.g.,  
414 task schedule) as well as the extent to which individuals find the task costly (e.g., cognitively  
415 demanding or mentally boring) are crucial in decision-making processes (Kool, McGuire, Rosen,  
416 & Botvinick, 2010).

417  
418 Our Subjective optimality model included two free parameters essential in capturing individuals'  
419 choice patterns. First, the reference point reflects each individual's belief about the environment  
420 (Tversky & Kahneman, 1979). It is known that beliefs can alter how individuals respond to given  
421 information, which not only affects their behavioral choices, but also neural responses (Gu et al.,  
422 2015). In line with this, we showed that discouraged expectation (scarce opportunities in  
423 Experiment 2) causes individuals to be more pessimistic about future chances and wait less in  
424 deciding (lowering thresholds). In addition, interestingly, individuals' expectations (reference  
425 point) were significantly higher when they did not have full information about stimuli distribution  
426 (Experiment 1). This result suggests that humans, in general, have optimistic bias (Sharot, Korn,  
427 & Dolan, 2011), which may diminish or even become inverted in other contexts (e.g., scarce  
428 opportunities, mental costs).

429  
430 Second, the nonlinear value sensitivity indicates the extent to which individuals' subjective  
431 valuation increases for an additional unit of reward. In the current study, the sensitivity represented  
432 as an exponent term in the utility function was smaller than one, which captures marginally

433 diminishing returns for gains and marginally increasing returns for losses (Tversky & Kahneman,  
434 1979). In our suggested model, a range of value sensitivity characterizes a spectrum of decision  
435 characteristics in individuals. Value sensitivity close to zero represents a rather categorical  
436 valuation (gain or loss relative to the reference point) and choices that are accounted for by a  
437 constant threshold being insensitive to the context (i.e., remaining opportunities). On the other  
438 hand, value sensitivity close to one represents objective valuation and choices that follow the  
439 Optimal decision model. In concert with the reference point, individuals' value sensitivity shapes  
440 the extent to which they take into account uncertainty of future opportunities in decision-making.  
441 This wide range of individual differences may explain why some individuals are more stubborn  
442 with their opinions (e.g., stereotype), while others easily adapt to contextual information (Taylor,  
443 1981).

444  
445 In the current study, the pupil responses encode both decision difficulty and the subsequent choice  
446 of whether individuals will accept or reject the presented stimulus. Both types of information  
447 temporally preceded actual choice, so these pupil dilations are the physiological representations of  
448 the processed information regarding decision-making, rather than a simple reflection of the  
449 presented visual information. As suggested from previous studies, pupil dilation may reflect the  
450 downstream processing of the anterior cingulate cortex (Cavanagh et al., 2014; Critchley, Tang,  
451 Glaser, Butterworth, & Dolan, 2005), the brain region that is involved in encoding decision  
452 difficulty (Shenhav, Straccia, Cohen, & Botvinick, 2014), and, more broadly, a wealth of value-  
453 related information—including difficulty signals—during decision-making processes (Kolling et  
454 al., 2016). Differential pupil sizes depending on the subsequent choices suggest that there is more  
455 to neurophysiological representation than simple decision difficulties. Individuals may pay more  
456 attention to the stimuli that they plan to accept for accumulating more evidence (Krajcich, Armel,  
457 & Rangel, 2010). Of course, such a process may have the opposite causality, in that the rich amount  
458 of accumulated evidence of a particular stimulus may induce even higher attention levels (e.g.,  
459 saliency driven bottom-up attention (Koch & Ullman, 1987)). In the current study, the latter is  
460 unlikely, given that all low-level visual information (e.g., contrast) of the displayed stimuli were  
461 matched or controlled for. The current results show that the two pieces of information essential in  
462 subjective valuation are linked together at the physiological level.

463  
464 The future direction of the current study includes expanding our model to further explain the  
465 mechanisms of how individuals learn the stimulus distribution (e.g., reinforcement learning). In  
466 the current study, we assumed that the learning process is rapid and negligible in relevance to other  
467 decision processes. Previous studies reported no evidence of learning in various versions of the  
468 secretary problem (Campbell & Lee, 2006; Seale & Rapoport, 1997). Moreover, we showed that  
469 decision processes under imperfect information (no knowledge of the maximum stimuli value)  
470 were comparable with the processes under the full information. This result suggests that, even  
471 without explicit information about the stimuli distribution, people, in general, have a rough idea  
472 about the range of values of an uncertain option. Alternatively, people were able to learn early  
473 enough (Goldstein, McAfee, Suri, & Wright, 2020) that the behavioral strategy for the rest of the  
474 task was not different from the case where individuals knew about the distribution from the  
475 beginning. Still, inclusion of learning mechanisms in the model would be essential to examine  
476 whether or not the decision model generalizes to broader contexts (e.g., a volatile environment).

477



478 Examples of finite sequential decision problems span a wide range of life choices, including  
479 finding the right life partner and choosing a career, the aims of which are to maximize reward  
480 under a limited amount of resources and opportunities. Such value-based decision processes with  
481 reference to costs are not unique to humans but extend from fish choosing a mate, who become  
482 less selective under costly environments (Milinski & Bakker, 1992), to primates making foraging  
483 decisions (Hayden, Pearson, & Platt, 2011). The Subjective optimality model provides a way in  
484 which individual subjective valuation generates systematic biases in sequential decision-making  
485 and opens a window to decompose physiological responses into decision difficulty and signatures  
486 of subsequent choice, of which levels differ in the extent of individual value sensitivity. In sum,  
487 our data support a mechanistic account of suboptimal choices varying from overly impulsive  
488 choices in individuals with substance-use problems (Ekhtiari, Victor, & Paulus, 2017) to delayed  
489 choices in individuals who suffer from indecisiveness (Rassin & Muris, 2005).  
490  
491



## 492 **Materials and Methods**

493  
494 **Participants.** Ninety-one healthy young adults (male/female = 45/46, age =  $22.88 \pm 1.93$  years)  
495 participated in the current study. All participants provided written informed consent and were paid  
496 for their participation. The study was approved by the Institutional Review Board of Ulsan  
497 National Institution of Science and Technology (UNISTIRB-18-39-C, UNISTIRB-18-14-A).  
498 None of the participants reported a history of neurological or psychiatric illness. Three separate  
499 experiments were conducted and there were no overlapping participants across experiments.  
500 Twenty students participated in Experiment 1 (male/female = 10/10, age =  $22.85 \pm 1.31$  years),  
501 and 47 students were recruited for Experiment 2 where they had five or two opportunities per  
502 round (male/female = 23/24, age =  $23.00 \pm 1.98$  years). Among the participants in Experiment 2,  
503 three participants were excluded from the analyses due to their reported suspicion about the  
504 payment structure of the experiment. Among the included participants, 21 students (male/female  
505 = 11/10, age =  $23.19 \pm 1.86$  years) were randomly assigned to the condition where they were given  
506 five opportunities per round, and 23 participants (male/female = 11/12, age =  $23.09 \pm 2.09$  years)  
507 were assigned to the condition where they were given two opportunities per round. Twenty-four  
508 students participated in Experiment 3 (male/female = 12/12, age =  $22.67 \pm 2.28$  years). Two  
509 participants were excluded due to their reported suspicion about the payment structure of the  
510 experiment, and one participant was excluded due to data loss from a computer error. Three  
511 participants were excluded from the pupil diameter analyses due to poor calibration. After  
512 exclusion, data from 21 participants (male/female = 11/10, age =  $22.62 \pm 2.38$  years) were used  
513 for behavioral analyses, and a subsample of the data (N = 18; male/female = 8/10, age =  $22.33 \pm$   
514  $2.30$  years) was used for further pupil diameter analyses. All participants reported normal or  
515 corrected-to-normal vision under soft contact lenses (no glasses were allowed due to potential  
516 reflections during eye-tracking).

517  
518 **Stimuli and apparatus.** All stimuli were generated using Psychophysics Toolbox Version 3  
519 ([www.psychtoolbox.org](http://www.psychtoolbox.org)) and MATLAB R2017a (MathWorks), and presented on a DLP projector  
520 (PROPixx VPX-PRO-5050B; screen size of  $163 \times 92$  cm<sup>2</sup>; resolution of  $1920 \times 1080$  pixels;  
521 refresh rate of 120 Hz; linear gamma). The distance between the participants' eyes and screen was  
522 fixed at 153 cm. The ambient and background luminance were set at 1.1 and 69.2 cd/m<sup>2</sup>,  
523 respectively. The main stimuli were three-digit integer numbers, randomly selected between zero  
524 and 150. To minimize luminance effects on pupil size, one- or two- digit numbers were displayed  
525 as three-digit numbers with extra zeros attached in front of the stimuli (e.g., 1 is displayed as '001').  
526 During the task, fixation was enforced at the center of the screen with an infrared eye tracker  
527 (Eyelink 1000 Plus, SR Research, Canada), and a chin and forehead rest were used to minimize  
528 head movement.

529  
530 **Experiments.** At the beginning of the task, the eye-tracker was calibrated, referencing eye fixation  
531 data at the four corners of the screen. During the task, participants made a series of choices either  
532 to accept or to reject presented stimuli (**Fig. 1A**). As explained above, the stimuli were randomly  
533 selected integers between zero and 150 where each number had equal probability of being selected  
534 (uniform distribution). Each presented number could be considered as an option whose value  
535 matches its face value because participants were instructed that all accepted numbers would be  
536 added to their final payoff at the end of the task. Given this knowledge, participants had a fixed  
537 number of opportunities (chances) to evaluate and reject a new randomly selected number. The

538 present ‘round’ ended when participants accepted a presented number within this limited number  
539 of opportunities, or when they ran out of the opportunities where they had no other choice but to  
540 accept the presented number at the last chance. At the beginning of each opportunity, participants  
541 were shown which opportunity they were currently at, so that they would not lose track of the  
542 number of remaining opportunities. A new round followed, at which the number of available  
543 opportunities was reset to the original maximum quantity. Participants were paid at the end of the  
544 study (after completing 200 rounds), based on the sum of the numbers they chose during the task.  
545 All instructions were provided through illustrated slides.

546  
547 Overall, we implemented three separate experiments, each of which had slightly different settings.  
548 In Experiment 1, participants had up to five opportunities ( $K = 5$ ), and they were not explicitly  
549 informed of the maximum number (150) that would be presented. Use of the context with  
550 incomplete information was to incorporate a more naturalistic setting as real-life problems where,  
551 as in most of the cases, individuals do not have knowledge about the best potential option (e.g.,  
552 even if the current candidate for a job has a good enough fit for the position, one cannot assure that  
553 a potential future candidate will not have a superior fit). Participants were instructed that the  
554 presented stimuli would be sampled from a uniform distribution, and thus, we expected that  
555 participants would quickly deduce the maximum range through iterative experiences. At the  
556 beginning of the new round, the accumulated payoff amount up until the last round was presented  
557 at the bottom of the screen. In Experiment 2, participants were randomly assigned to one of two  
558 conditions where one condition had five ( $K = 5$ ) and one condition had two ( $K = 2$ ) opportunities.  
559 Here, participants were also informed of the maximum number (i.e., 150). In addition, participants  
560 were given a practice session that comprised two rounds where all the stimuli were ‘000’, which  
561 allowed them to be familiarized with associated buttons and the task screen settings. All the rest  
562 of the task settings were identical to Experiment 1.

563  
564 Experiment 3 was designed to temporally dissociate actions (i.e., accept or reject) from the  
565 stimulus onset, so that physiological responses to stimuli independent from potential motor  
566 preparatory signals could be measured. Particularly in Experiment 3, participants were not allowed  
567 to make choices until an audio cue was played (**Fig. 4**). The audio cue was played between 1.5 and  
568 2.5 seconds after stimulus onset (uniform distribution), which allowed us to tease out potential  
569 confounding factors related to action from the pupil diameter measures at 0-1.5 seconds after  
570 stimulus onset. In addition, to prevent participants from making unnecessary eye movements, all  
571 the information including number stimuli were presented at the center of the screen. As  
572 implemented in Experiment 2 where  $K = 5$ , participants were informed that the maximum number  
573 was 150 and that they have up to five chances to evaluate the stimuli per each round.

574  
575 **Behavioral analysis.** For all three tasks, behavioral choices (accept or reject) and response time  
576 (RT) were measured. Individuals’ decision threshold for each opportunity was estimated from their  
577 choices. To estimate empirical decision threshold for each opportunity, a cumulative distribution  
578 function of Gaussian distribution was fitted to individuals’ choice data that corresponded to the  
579 same opportunity across all 200 rounds. The mean and variance parameters of the Gaussian  
580 distribution represent the decision threshold and decision variability, respectively. A set of best-  
581 fitting parameters that maximize the likelihood of the data was estimated per individual using the  
582 Nelder-Mead simplex algorithm provided by MATLAB R2017b.

583

584 **Computational modeling and model comparison.** For a formal model comparison at the group  
 585 level, choices from all 200 rounds per participant were used for parameter estimation. We used  
 586 likelihood-ratio tests to compare goodness-of-fit of the models for explaining participants'  
 587 decisions.

588  
 589 **Optimal decision model.** An optimal decision maker is expected to maximize their payoff by  
 590 estimating the expected value of each opportunity. This computation can be conducted from the  
 591 final opportunity to the first, given the full information about the stimuli distribution ( $U[0, 150]$ ).  
 592 For example, in a condition where  $K = 5$ , the expected value of the last opportunity is 75, and  
 593 therefore a payoff-maximizing optimal decision maker should set 75 as the decision threshold of  
 594 the fourth opportunity (i.e., accept numbers larger than 75 and reject those that are lower). Then,  
 595 this decision strategy should again determine the expected value of the fourth opportunity.  
 596 Generalizing this dynamic programming approach, the decision threshold of the  $i^{\text{th}}$  opportunity  
 597 ( $\vartheta[i]$ ) can be written as follows:

$$598 \vartheta[i] = \frac{\lfloor \vartheta[i+1] \rfloor}{151} \vartheta[i+1] + \frac{1}{151} \sum_{v=\lfloor \vartheta[i+1] \rfloor+1}^{150} v \quad (i \in (K-1, K-2, \dots, 1))$$

$$599 \vartheta[K] = 0$$

600 where  $\lfloor x \rfloor$  indicates the greatest integer less than or equal to  $x$ .

601  
 602 **Subjective optimality model.** Our hypothesis was that individuals use subjective valuation in  
 603 reference to their own expectations about the environment during finite sequential decision-  
 604 making. To test the hypothesis, we constructed a computational model drawn upon Prospect theory  
 605 (Kahneman & Tversky, 1979). Particularly, individuals' subjective valuation ( $U$ ) of an objective  
 606 value ( $v$ ) was defined as below:

$$607 U = (v - r)^\rho \quad \text{if } v \geq r$$

$$608 U = -(r - v)^\rho \quad \text{otherwise}$$

609 where  $\rho$  and  $r$  indicate individuals' nonlinear value sensitivity and reference point, respectively.  
 610 Subjective valuation is also used in computing decision thresholds:

$$611 \vartheta[i] = U^{-1} \left( \frac{\lfloor \vartheta[i+1] \rfloor}{151} U(\vartheta[i+1]) + \frac{1}{151} \sum_{v=\lfloor \vartheta[i+1] \rfloor+1}^{150} U(v) \right)$$

612 where  $U^{-1}(\cdot)$  indicates an inverse function of the aforementioned subjective value function.

613  
 614 **Subjective optimality model with a waiting cost.** In our secretary problem task, choosing to  
 615 reject the current stimulus means that participants have to go through further steps (opportunities)  
 616 to receive rewards (or at least to find out how much reward they will receive) until they choose to  
 617 accept at a later opportunity. Such an additional wait may introduce a disutility (i.e., negative value)  
 618 against the choice to reject. To test this possibility and quantitatively estimate this 'mental waiting  
 619 cost', we modified our suggested Subjective optimality model to a more general format as follows:

$$620 \vartheta[i] = U^{-1} \left( \frac{\lfloor \vartheta[i+1] \rfloor}{151} U(\vartheta[i+1]) + \frac{1}{151} \sum_{v=\lfloor \vartheta[i+1] \rfloor+1}^{150} U(v) - C \right)$$

628

629 where  $C$  indicates a waiting cost per opportunity. Note that the waiting cost lowers the expected  
630 utility of the following opportunity ( $i+1^{\text{th}}$ ), and thus has an effect of lowering the decision threshold  
631 of the current opportunity ( $i^{\text{th}}$ ).  
632

633 **Constant threshold model.** There is a simple alternative decision strategy for the secretary  
634 problem: to use a constant decision threshold throughout all opportunities. To examine this  
635 possibility, we estimated one decision threshold per individual. This constant threshold model  
636 provides a quantitative baseline for a formal model comparison.  
637

638 **Predicting change of decision threshold based on the altered decision context.** To examine  
639 whether or not our suggested model can be generalized under different contexts with scarce  
640 opportunities, we took a prediction approach using model-based information from the context with  
641 abundant opportunities. Specifically, the reference point and nonlinear value sensitivity parameters  
642 estimated from behavioral choices of individuals ( $N=21$ ) who participated in Experiment 2,  $K = 5$   
643 were used to predict the decision threshold in the two opportunities condition ( $K = 2$ ). Particularly  
644 for the nonlinear value sensitivity, the parameter distribution in the  $K = 2$  condition was assumed  
645 to be the same as that in the  $K = 5$  condition. On the other hand, the parameter distribution of the  
646 reference point was assumed to be shifted down by the difference of expected earnings between  
647 the two conditions, reflecting participants' acknowledgement of the scarce number of  
648 opportunities. To be agnostic about differential subjective valuation under different contexts, the  
649 change of participants' expectation about mean earning was calculated comparing expected values  
650 between conditions. To predict the mean threshold in the  $K = 2$  condition, 23 pairs of parameters  
651 (matching the number of participants in  $K = 2$ ) were randomly sampled with replacement from the  
652 aforementioned parameter distribution, and the thresholds corresponding to each parameter pair  
653 were computed by applying our model. The procedure was repeated 5,000 times to estimate the  
654 distribution of the mean of 23 thresholds. The 95% confidence interval was computed from the  
655 5,000 means.  
656

657 **Parameter estimation procedure.** We used Bayesian hierarchical analysis to estimate the best-  
658 fitting parameters for participants' choice data (Daw, 2011). The parameters characterizing  
659 individual participants were drawn from the population distributions, each of which follows a  
660 Gaussian distribution. The priors on the means of the population distributions ( $\mu$ ) were set to broad  
661 uniform distributions, and the priors on the SDs ( $\sigma$ ) were set to an inverse-Gamma distribution in  
662 each of which, the shape parameter  $\alpha$  is one and the scale parameter  $\beta$  is manually selected.  
663 To improve sampling efficiency, we sampled the parameters from a transformed space, and the  
664 hierarchical structure was assumed in the transformed space. Specifically, the reference point and  
665 value sensitivity parameters were sampled without domain restrictions and transformed by a scaled  
666 logistic function  $g(x) = A/(1+\exp(-x))$  before applying to the model. In the function  $g(x)$ ,  $A$  was  
667 set to 150 for the reference point parameter  $r$ , and set to 2 for the values sensitivity parameter  $\rho$ .  
668 The decision variability parameters and the group-level hyper-parameters for parameters' standard  
669 deviation were transformed by  $\exp(\cdot)$  after sampling. We did not apply a transformation to the  
670 waiting cost parameter. A Markov chain Monte Carlo (MCMC) method (Metropolis-Hastings  
671 algorithm) was used to sample from the posterior density of the parameters conditioned on all of  
672 the participants' choices. We estimated the most likely set of parameters for each participant from  
673 the resulting chain of samples using a multivariate Gaussian kernel function provided by  
674 MATLAB R2017b.

675  
676 **Pupillometry: Preprocessing.** Pupil diameter was sampled at 500 Hz from both eyes using an  
677 infrared eye-tracker (Eyelink 1000 Plus; SR Research, Kanata, Canada) and recorded continuously  
678 for the entire session. Blinks and saccades in each eye were identified using the standard criteria  
679 provided by Eyelink, and the identified intervals were linearly interpolated. Particularly for the  
680 blink events, the interpolation was applied to the intervals between 150 ms before and after each  
681 identified blink. Three participants whose pupil data included a large proportion of interpolated  
682 intervals (> 50 %) were excluded from further analyses. The means of the interpolated data from  
683 both eyes were band-pass filtered between 0.02-4 Hz using third-order Butterworth filters. The  
684 long-lasting effects (~ 5 sec) of blinks on pupil diameter were identified by applying least-squares  
685 deconvolution to individual data, and then removed from the data (Knapen et al., 2016). Then, the  
686 resulting data were z-scored for each session (i.e., each participant). Pupil diameter changes in  
687 response to the value stimulus were computed for each opportunity. Each epoch was defined for  
688 pupil responses between -200 and 1,500 msec around the stimulus onset, and corrected for its  
689 baseline by subtracting the mean pupil size around ( $\pm 20$  msec) the onset. The choice trials that  
690 required a large proportion (> 50%) of interpolation were excluded from the analysis, which  
691 comprised 28% of the entire choice trials.

692  
693 **Pupillometry: Statistical tests.** To examine whether physiological responses reflect cognitive  
694 decision processes, we tested pupil dilations and contractions in response to (i) subsequent choices  
695 to accept or reject, and (ii) decision difficulty. First, pupil diameter changes between 0-1,500 msec  
696 after the stimulus onset were compared between accepted and rejected opportunities. We used t-  
697 tests to compare mean differences at each time step and defined statistically significant temporal  
698 clusters (alpha level set to 0.05). To control for the false alarm rate, we used the cluster-based  
699 permutation method (Maris & Oostenveld, 2007) and examined the statistical significance of each  
700 cluster. Particularly in the permutation procedure, the sign of the difference value for each  
701 participant was randomized and the sum of t-values in each cluster was used as its statistic. Second,  
702 the pupil dilation at 1,500 msec after the stimulus onset was used to examine the effect of decision  
703 difficulty—the absolute distance between the corresponding decision threshold and the presented  
704 value—on the pupil dilation. Linear regression was used for the rejected trials (choice = reject,  $-$   
705  $40 < \text{value} - \text{threshold} < 5$ ) and accepted trials (choice = accept,  $-5 < \text{value} - \text{threshold} < 40$ )  
706 separately for each participant. The same set of data points was used to test the effect of choice on  
707 pupil dilation after controlling for the decision difficulty. We further investigated individual  
708 differences in the extent to which one responds to stimulus value at the physiological level (i.e.,  
709 pupil dilation). Pupil dilation at 1500 msec after the stimulus onset was used. We smoothed each  
710 individual's pupil dilation data along the threshold centered values from -90 to 60 by applying  
711 local regression using a 2D polynomial model provided by MATLAB R2017b. The estimated  
712 pupil dilation at threshold was used to calculate the Pearson correlation between individuals'  
713 estimated value sensitivity and their pupil responses.

714

715 **Acknowledgements:**

716

717 **Funding:** This work was supported in part by the National Research Foundation of Korea (NRF-  
718 2018R1A2B6008959 to Kwon; NRF-2018R1D1A1B07043582 to Chung).

719

720 **Author contributions:** Y.K.S., D.C., and O.-S.K. designed the experiments. Y.S., H.S., D.C., and  
721 O.-S.K. analyzed the data. H.S., D.C. and O.-S.K. drafted the manuscript. All of the authors  
722 discussed the results, revised, and approved the final manuscript.

723

724 **Competing interests:** The authors declare no competing interests.

725

726 **Data and materials availability:** The datasets generated during and/or analyzed during the  
727 current study are available from the corresponding authors on reasonable request.

728

729

730



## 731 **References**

- 732
- 733 Bearden, J. N., Rapoport, A., & Murphy, R. O. (2006). Experimental studies of sequential  
734 selection and assignment with relative ranks. *Journal of Behavioral Decision Making*,  
735 *19*(3), 229-250.
- 736 Bellman, R. (1966). Dynamic programming. *Science*, *153*(3731), 34-37.
- 737 Campbell, J., & Lee, M. D. (2006). *The Effect of Feedback and Financial Reward on Human*  
738 *Performance Solving 'Secretary' Problems*. Paper presented at the Proceedings of the  
739 Annual Meeting of the Cognitive Science Society.
- 740 Cavanagh, J. F., Wiecki, T. V., Kochar, A., & Frank, M. J. (2014). Eye tracking and  
741 pupillometry are indicators of dissociable latent decision processes. *Journal of*  
742 *Experimental Psychology: General*, *143*(4), 1476.
- 743 Chow, Y., Moriguti, S., Robbins, H., & Samuels, S. (1964). Optimal selection based on relative  
744 rank (the “secretary problem”). *Israel Journal of mathematics*, *2*(2), 81-90.
- 745 Costa, V. D., & Averbeck, B. B. (2015). Frontal–parietal and limbic-striatal activity underlies  
746 information sampling in the best choice problem. *Cerebral cortex*, *25*(4), 972-982.
- 747 Critchley, H. D., Tang, J., Glaser, D., Butterworth, B., & Dolan, R. J. (2005). Anterior cingulate  
748 activity during error and autonomic response. *Neuroimage*, *27*(4), 885-895.
- 749 Daw, N. D. (2011). Trial-by-trial data analysis using computational models. *Decision making,*  
750 *affect, and learning: Attention and performance XXIII*, *23*(1).
- 751 de Gee, J. W., Knapen, T., & Donner, T. H. (2014). Decision-related pupil dilation reflects  
752 upcoming choice and individual bias. *Proceedings of the National Academy of Sciences*,  
753 *111*(5), E618-E625.
- 754 Ekhtiari, H., Victor, T. A., & Paulus, M. P. (2017). Aberrant decision-making and drug  
755 addiction—how strong is the evidence? *Current opinion in behavioral sciences*, *13*, 25-  
756 33.
- 757 Ferguson, T. S. (1989). Who solved the secretary problem? *Statistical science*, *4*(3), 282-289.
- 758 Freeman, P. (1983). The secretary problem and its extensions: A review. *International Statistical*  
759 *Review/Revue Internationale de Statistique*, 189-206.
- 760 Goldstein, D. G., McAfee, R. P., Suri, S., & Wright, J. R. (2020). Learning when to stop  
761 searching. *Management Science*, *66*(3), 1375-1394.
- 762 Gu, X., Lohrenz, T., Salas, R., Baldwin, P. R., Soltani, A., Kirk, U., . . . Montague, P. R. (2015).  
763 Belief about nicotine selectively modulates value and reward prediction error signals in  
764 smokers. *Proceedings of the National Academy of Sciences*, *112*(8), 2539-2544.
- 765 Guan, M., & Lee, M. D. (2018). The effect of goals and environments on human performance in  
766 optimal stopping problems. *Decision*, *5*(4), 339.
- 767 Hayden, B. Y., Pearson, J. M., & Platt, M. L. (2011). Neuronal basis of sequential foraging  
768 decisions in a patchy environment. *Nature neuroscience*, *14*(7), 933.
- 769 Hill, T. P., & Krengel, U. (1991). Minimax-optimal stop rules and distributions in secretary  
770 problems. *The Annals of Probability*, *19*(1), 342-353.
- 771 Kable, J. W., & Glimcher, P. W. (2007). The neural correlates of subjective value during  
772 intertemporal choice. *Nature neuroscience*, *10*(12), 1625-1633.
- 773 Kahneman, D., & Tversky, A. (1979). Prospect theory: An analysis of decision under risk.  
774 *Econometrica: Journal of the Econometric Society*, 263-291.

- 775 Knapen, T., de Gee, J. W., Brascamp, J., Nuiten, S., Hoppenbrouwers, S., & Theeuwes, J.  
776 (2016). Cognitive and ocular factors jointly determine pupil responses under  
777 equiluminance. *PloS one*, *11*(5).
- 778 Koch, C., & Ullman, S. (1987). Shifts in selective visual attention: towards the underlying neural  
779 circuitry. In *Matters of intelligence* (pp. 115-141): Springer.
- 780 Kolling, N., Wittmann, M. K., Behrens, T. E., Boorman, E. D., Mars, R. B., & Rushworth, M. F.  
781 (2016). Value, search, persistence and model updating in anterior cingulate cortex.  
782 *Nature neuroscience*, *19*(10), 1280.
- 783 Kool, W., McGuire, J. T., Rosen, Z. B., & Botvinick, M. M. (2010). Decision making and the  
784 avoidance of cognitive demand. *Journal of Experimental Psychology: General*, *139*(4),  
785 665.
- 786 Krajbich, I., Armel, C., & Rangel, A. (2010). Visual fixations and the computation and  
787 comparison of value in simple choice. *Nature neuroscience*, *13*(10), 1292.
- 788 Loewenstein, G., & Prelec, D. (1992). Anomalies in intertemporal choice: Evidence and an  
789 interpretation. *The Quarterly Journal of Economics*, *107*(2), 573-597.
- 790 Maris, E., & Oostenveld, R. (2007). Nonparametric statistical testing of EEG-and MEG-data.  
791 *Journal of neuroscience methods*, *164*(1), 177-190.
- 792 Milinski, M., & Bakker, T. C. (1992). Costs influences sequential mate choice in sticklebacks,  
793 *gasterosteus aculeatus*. *Proceedings of the Royal Society of London. Series B: Biological*  
794 *Sciences*, *250*(1329), 229-233.
- 795 Nassar, M. R., Rumsey, K. M., Wilson, R. C., Parikh, K., Heasley, B., & Gold, J. I. (2012).  
796 Rational regulation of learning dynamics by pupil-linked arousal systems. *Nature*  
797 *neuroscience*, *15*(7), 1040.
- 798 Rangel, A., Camerer, C., & Montague, P. R. (2008). A framework for studying the neurobiology  
799 of value-based decision making. *Nature reviews neuroscience*, *9*(7), 545-556.
- 800 Rassin, E., & Muris, P. (2005). To be or not to be... indecisive: Gender differences, correlations  
801 with obsessive-compulsive complaints, and behavioural manifestation. *Personality and*  
802 *Individual Differences*, *38*(5), 1175-1181.
- 803 Ratcliff, R. (1978). A theory of memory retrieval. *Psychological review*, *85*(2), 59.
- 804 Seale, D. A., & Rapoport, A. (1997). Sequential decision making with relative ranks: An  
805 experimental investigation of the "secretary problem". *Organizational behavior and*  
806 *human decision processes*, *69*(3), 221-236.
- 807 Sharot, T., Korn, C. W., & Dolan, R. J. (2011). How unrealistic optimism is maintained in the  
808 face of reality. *Nature neuroscience*, *14*(11), 1475.
- 809 Shenhav, A., Straccia, M. A., Cohen, J. D., & Botvinick, M. M. (2014). Anterior cingulate  
810 engagement in a foraging context reflects choice difficulty, not foraging value. *Nature*  
811 *neuroscience*, *17*(9), 1249.
- 812 Taylor, S. E. (1981). A categorization approach to stereotyping. *Cognitive processes in*  
813 *stereotyping and intergroup behavior*, 832114.
- 814 Tversky, A., & Kahneman, D. (1979). Prospect theory: An analysis of decision under risk.  
815 *Econometrica*, *47*(2), 263-291.
- 816 Urai, A. E., Braun, A., & Donner, T. H. (2017). Pupil-linked arousal is driven by decision  
817 uncertainty and alters serial choice bias. *Nature communications*, *8*(1), 1-11.
- 818 Van Slooten, J. C., Jahfari, S., Knapen, T., & Theeuwes, J. (2018). How pupil responses track  
819 value-based decision-making during and after reinforcement learning. *PLoS*  
820 *computational biology*, *14*(11), e1006632.

821 Yeo, G. F. (1998). Interview costs in the secretary problem. *Australian & New Zealand Journal*  
822 *of Statistics*, 40(2), 215-219.  
823
